# Supplementary material for: Hybrid lanthanide complexes based on a novel β-diketone functionalized polyhedral oligomeric silsesquioxane (POSS) and their nanocomposites with PMMA via in situ polymerization
Source: Royal Society of Chemistry journal article supplement (doi:10.1039/c4ra05577b), 2014-01-01
Supplement: c4ra05577b1.pdf [file c4ra05577b1.pdf]

## Supporting Information

### **Hybrid Lanthanide Complexes Based on a Novel $\beta$ -Diketone Functionalized Polyhedral Oligomeric Silsesquioxane (POSS) and Their Nanocomposites with PMMA *via* in Situ Polymerization**

*Liguo Li, Shengyu Feng, and Hongzhi Liu\**

Key Laboratory of Special Functional Aggregated Materials, Ministry of Education,  
School of Chemistry and Chemical Engineering, Shandong University, Jinan 250100,

P. R. China

E-mail: liuhongzhi@sdu.edu.cn

**Table S1.** Binding energy values of C<sup>1s</sup>, O<sup>1s</sup>, N<sup>1s</sup>, S<sup>2p</sup>, Tb<sup>4d</sup> of POSS\_Tb\_3, POSS\_dendrimer and Tb(NO<sub>3</sub>)<sub>3</sub>·6H<sub>2</sub>O

| Condition                                            | C <sup>1s</sup> (eV) | O <sup>1s</sup> (eV) | N <sup>1s</sup> (eV) | S <sup>2p</sup> (eV) | Tb <sup>4d</sup> (eV) |
|------------------------------------------------------|----------------------|----------------------|----------------------|----------------------|-----------------------|
| POSS_Tb                                              | 284.7                | 532                  | 407                  | 162.7                | 153.3                 |
| Tb(NO <sub>3</sub> ) <sub>3</sub> ·6H <sub>2</sub> O | 284.8                | 533                  | 408                  | 162.7                | 151.7                 |

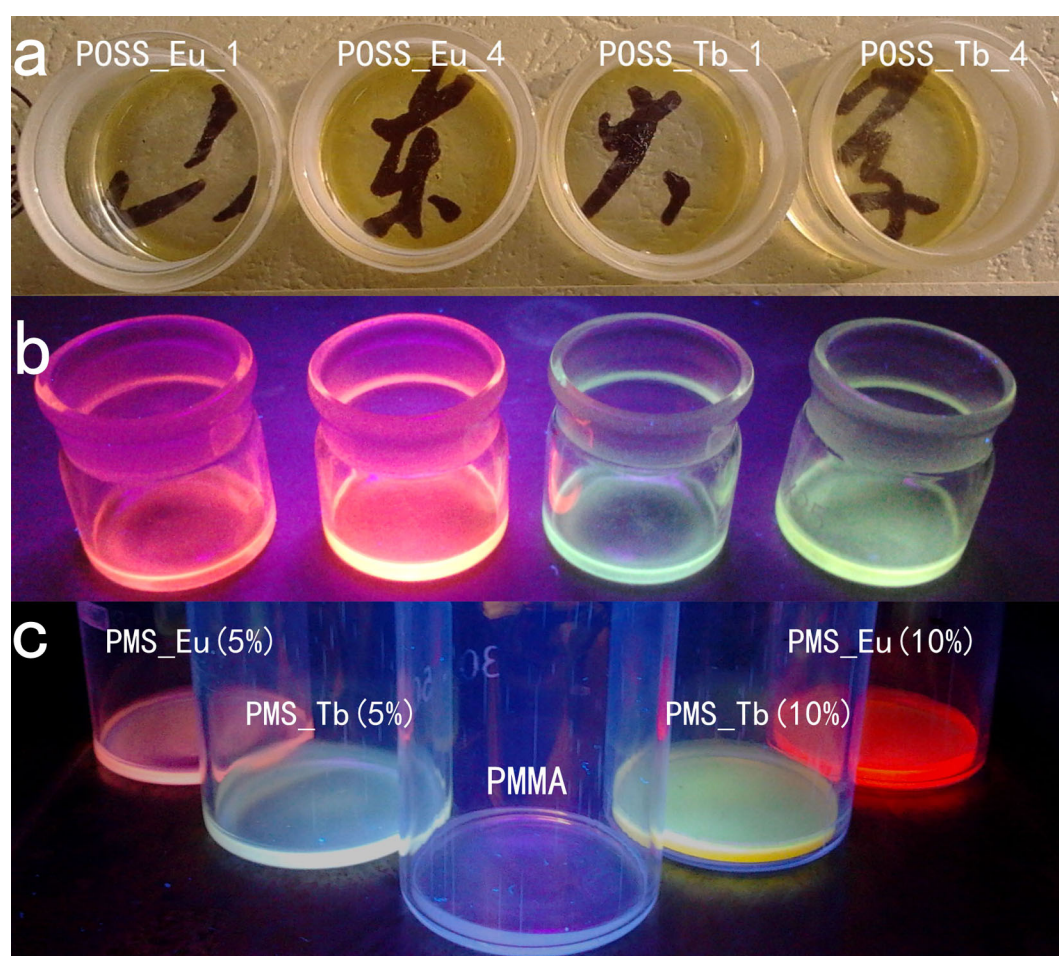

**Figure S1.** (a) Photograph of POSS\_Ln (Eu<sup>3+</sup> and Tb<sup>3+</sup>) complexes. (b), (c) Fluorescence images of POSS\_Ln and PMS\_Ln under 365 nm UV light.

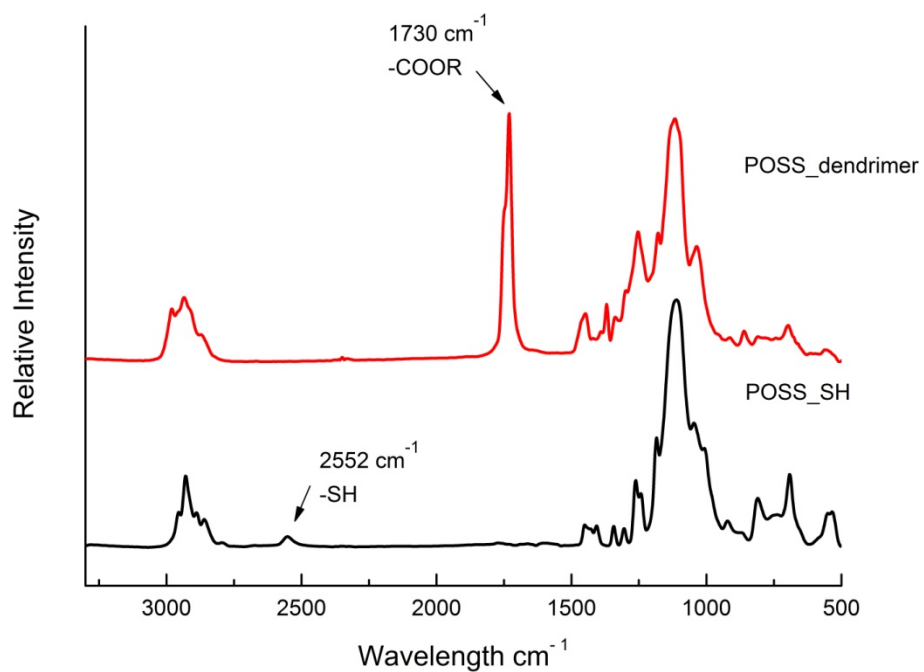

**Figure S2.** FT-IR spectra of POSS\_dendrimer and POSS\_SH.

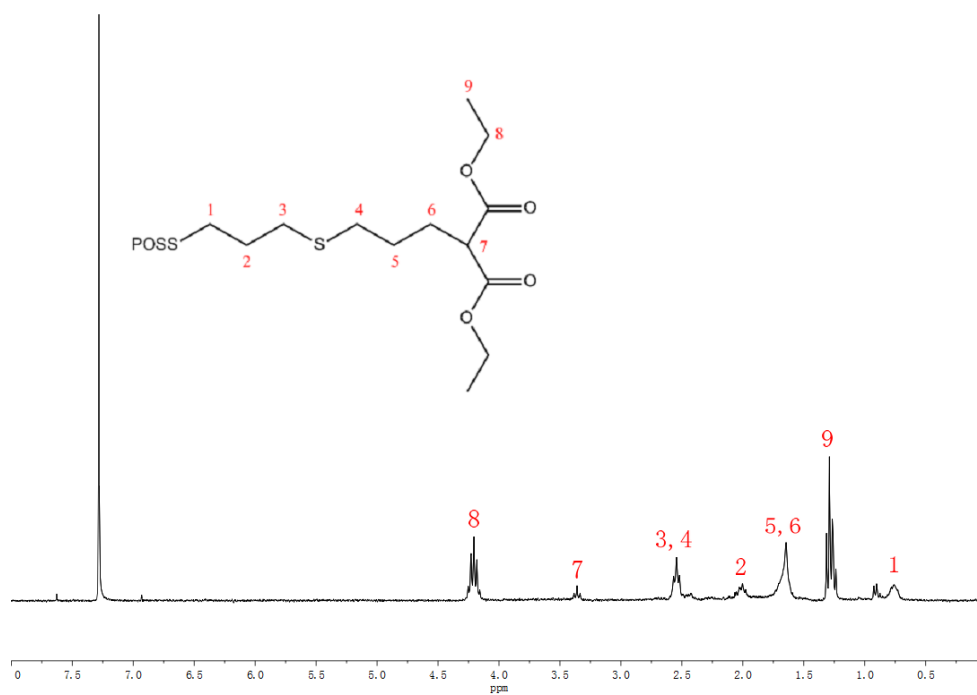

**Figure S3.**  $^1\text{H}$  NMR spectra of POSS\_dendrimer

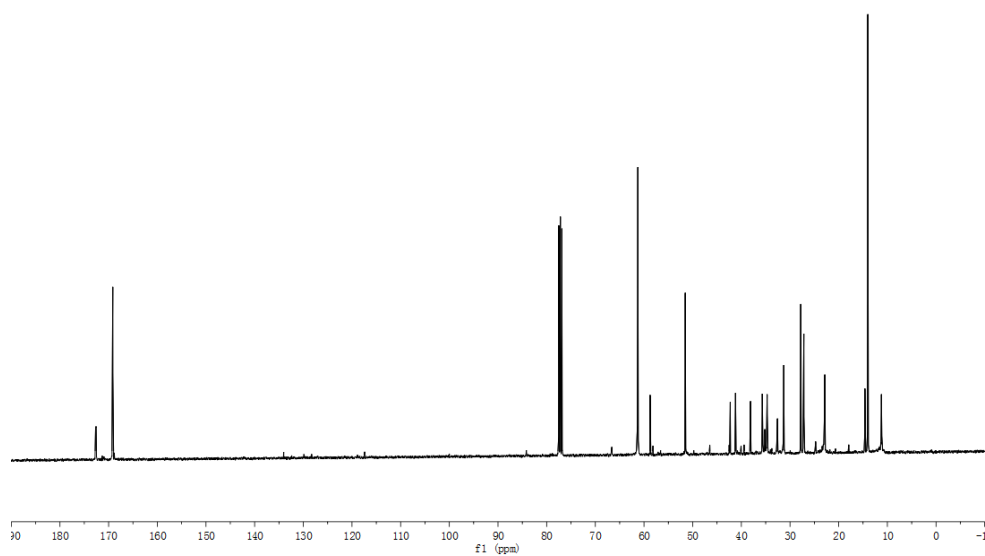

**Figure S4.**  $^{13}\text{C}$  NMR spectra of POSS\_dendrimer.

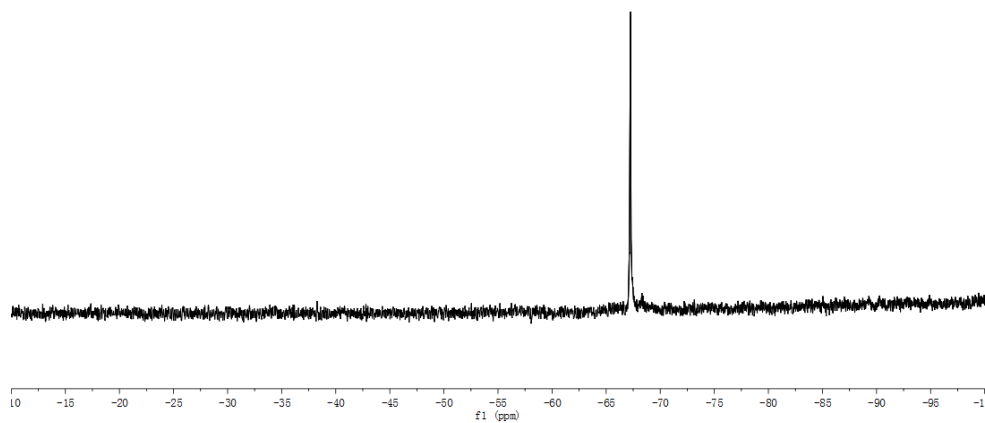

**Figure S5.**  $^{29}\text{Si}$  NMR spectra of POSS\_dendrimer.

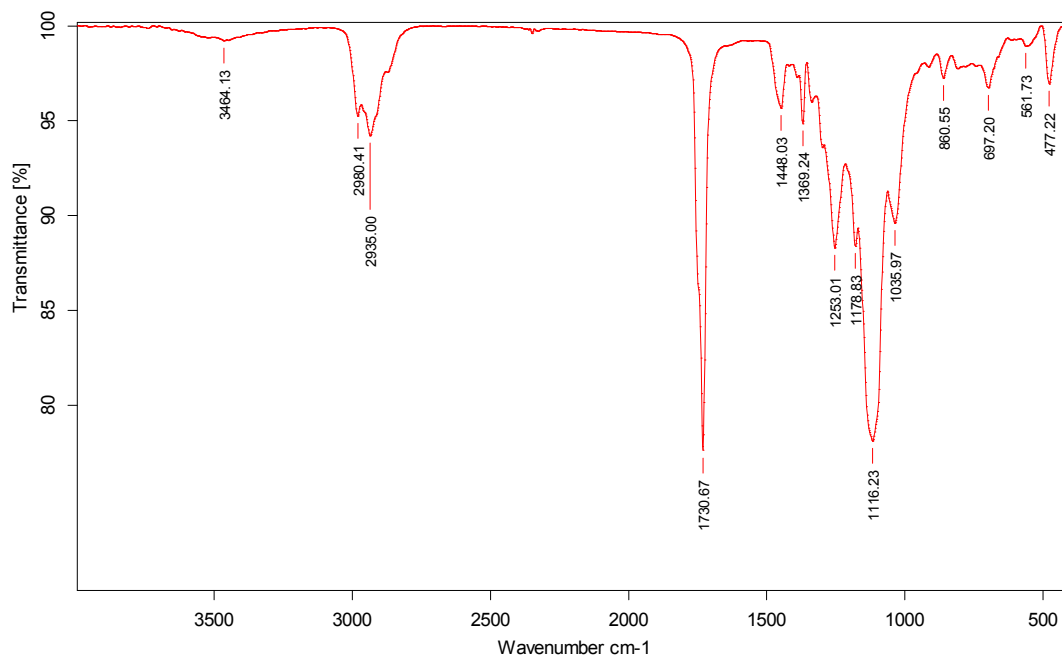

**Figure S6.** FT-IR spectra of POSS\_dendrimer.

Generic Display Report (all)

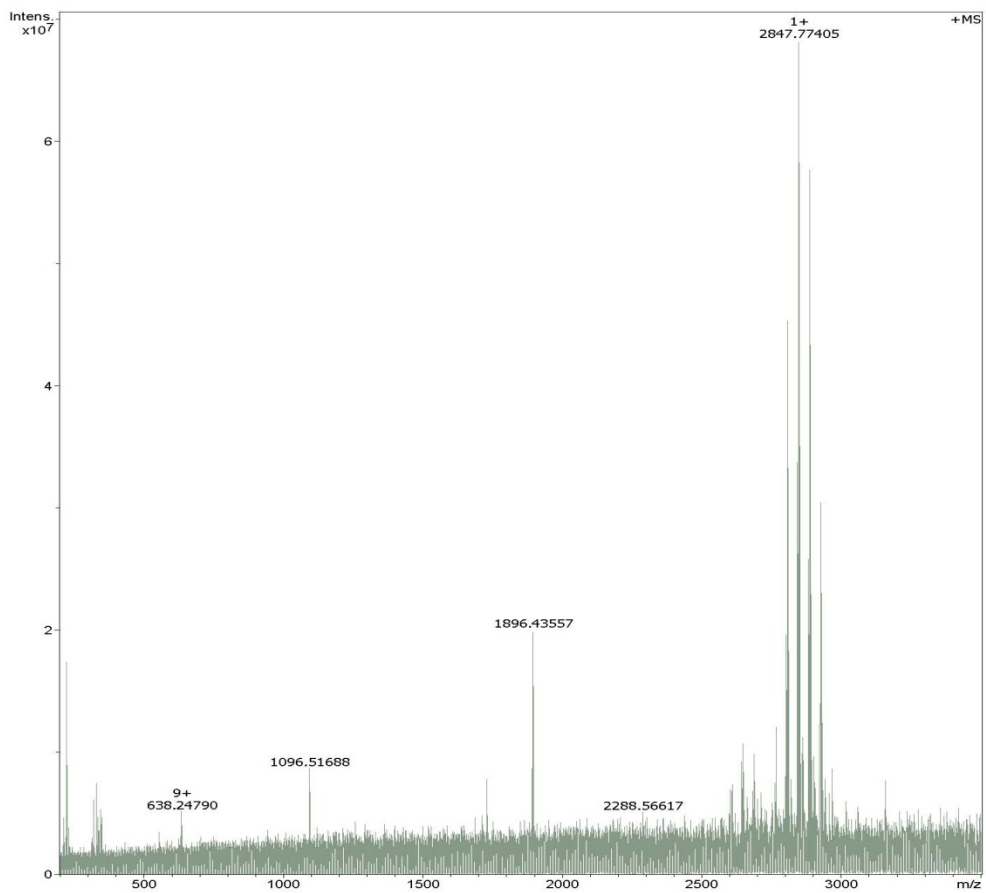

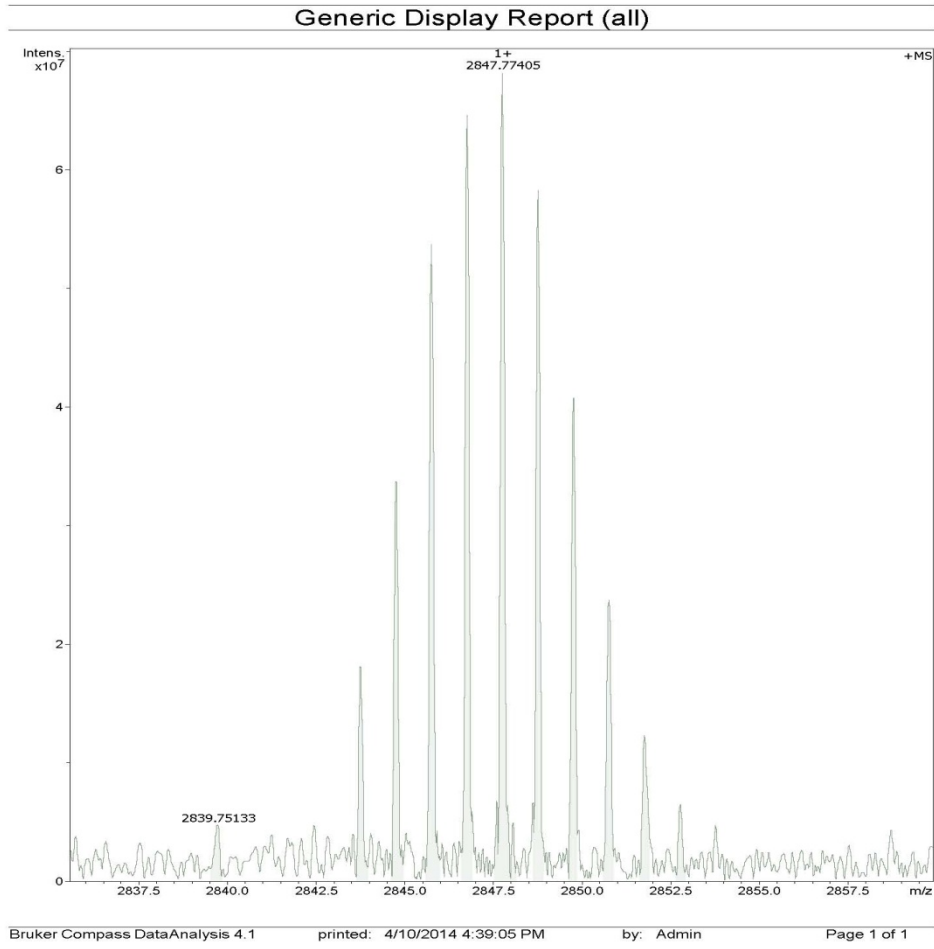

**Figure S7** MALDI-FTMS spectrum of POSS\_dendrimer

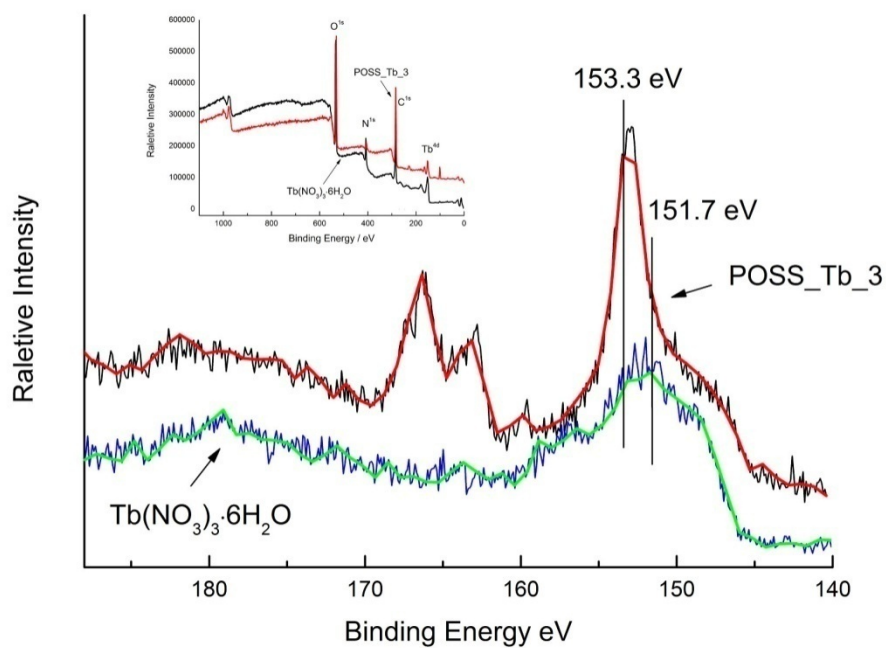

**Figure S8.** XPS image of Tb<sup>4d</sup> in POSS\_Tb\_3 and Tb(NO<sub>3</sub>)<sub>3</sub>·6H<sub>2</sub>O.

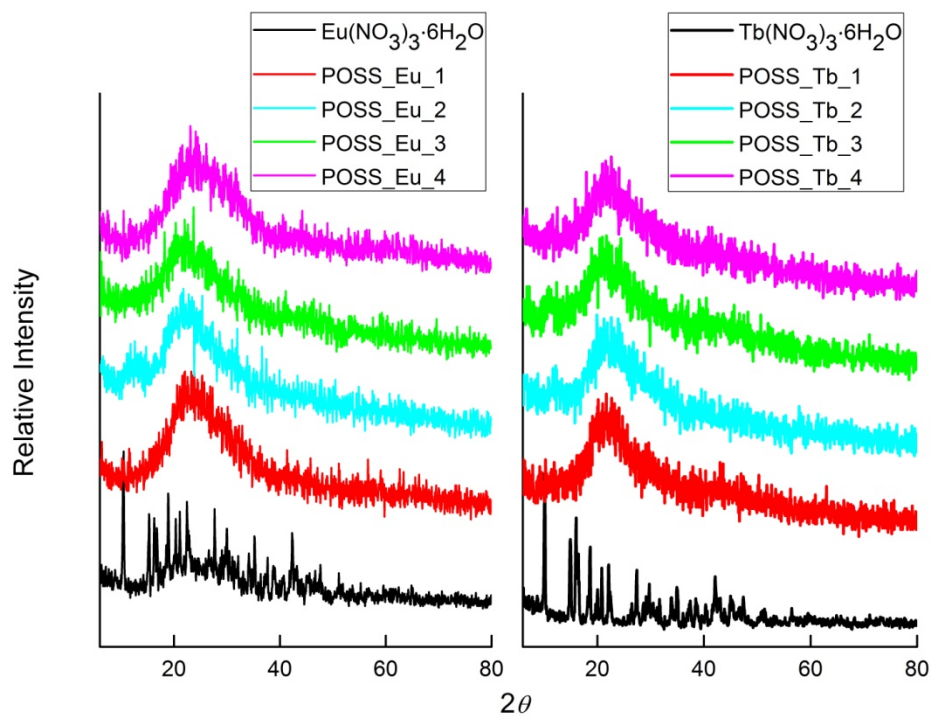

**Figure S9.** PXRD figures of POSS\_Ln (Eu<sup>3+</sup> and Tb<sup>3+</sup>).



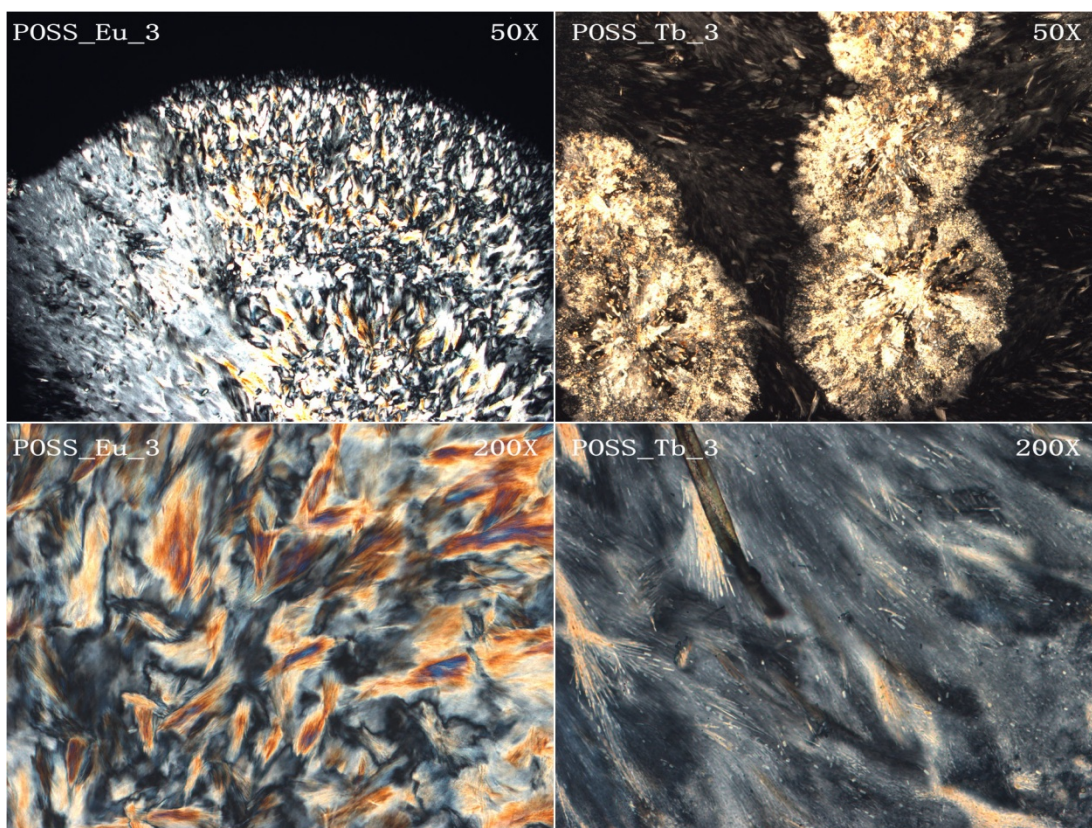

**Figure S10.** POM images of POSS\_Ln\_3 (Eu<sup>3+</sup> and Tb<sup>3+</sup>).

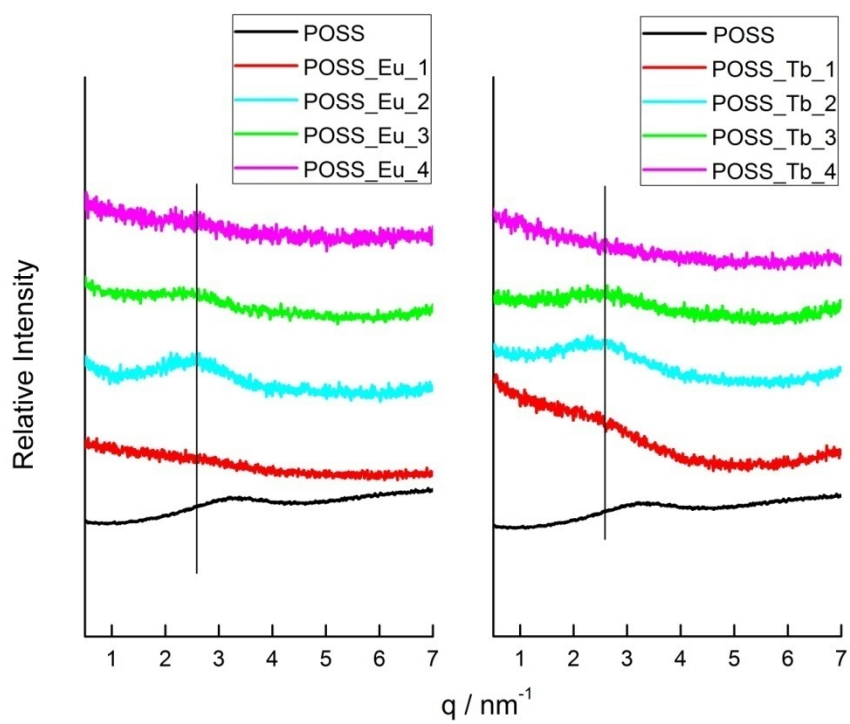

**Figure S11.** SAXS figures of POSS\_Ln (Eu<sup>3+</sup> and Tb<sup>3+</sup>).

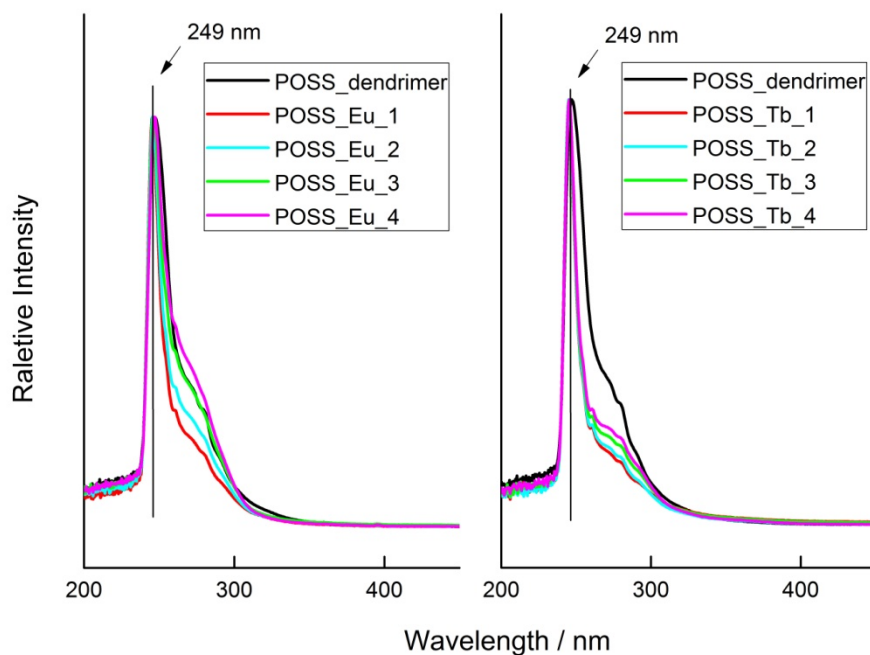

**Figure S12.** UV spectra of POSS\_Ln (Eu<sup>3+</sup> and Tb<sup>3+</sup>) in THF solution ( $1.0 \times 10^{-4}$  M).

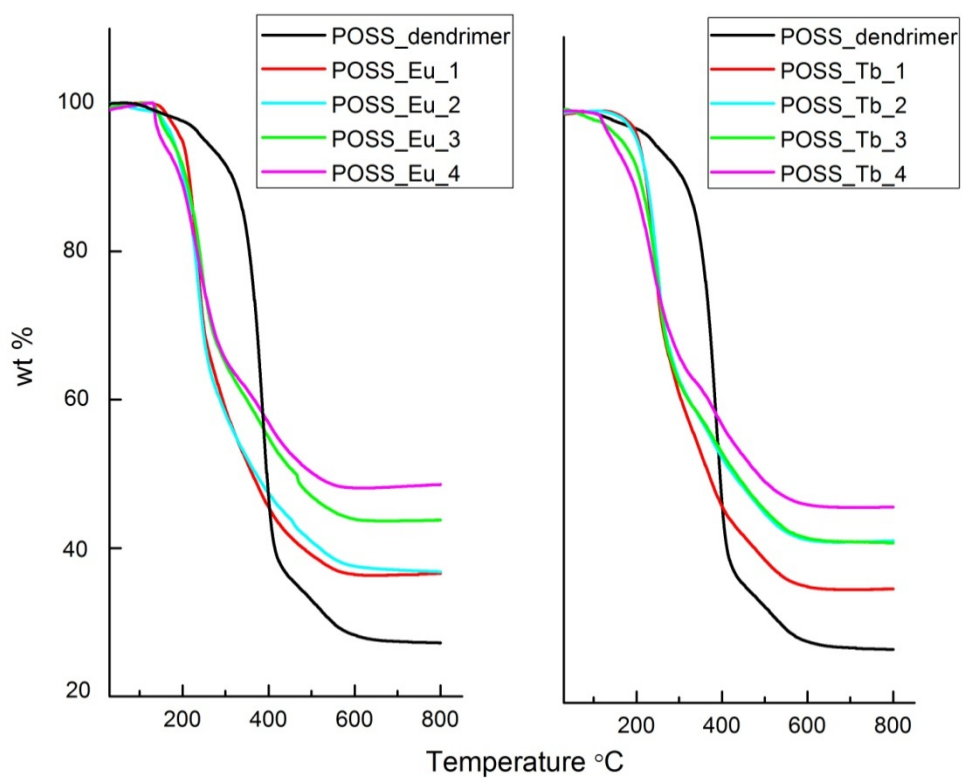

**Figure S13.** Thermal gravimetric analysis of POSS\_Ln (Eu<sup>3+</sup> and Tb<sup>3+</sup>) complexes.

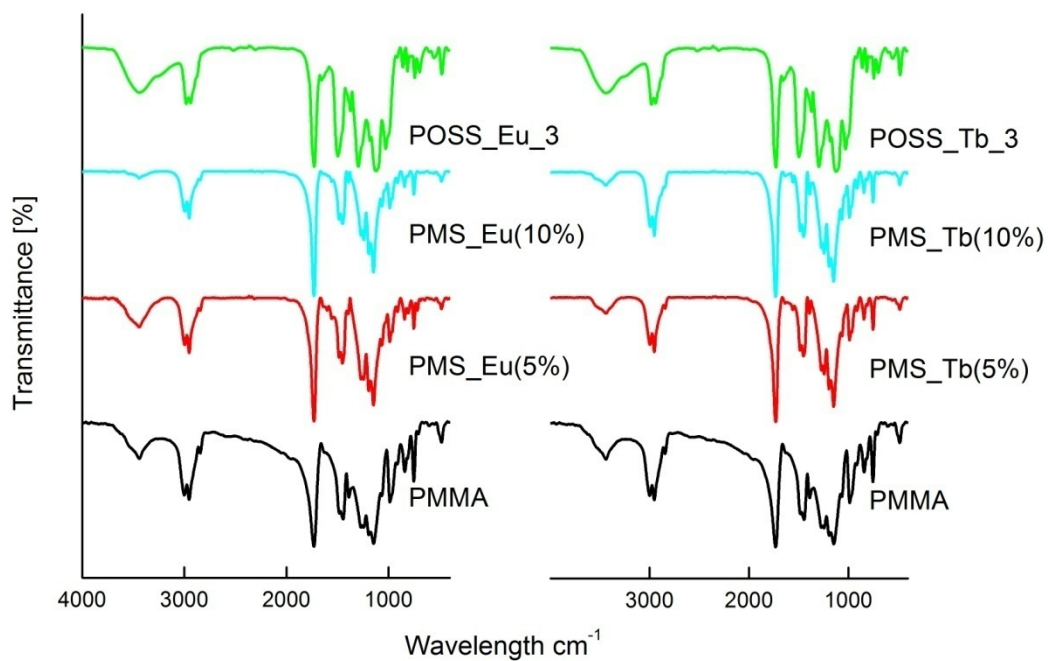

**Figure S14.** FT-IR spectroscopy of PMMA nanocomposites.

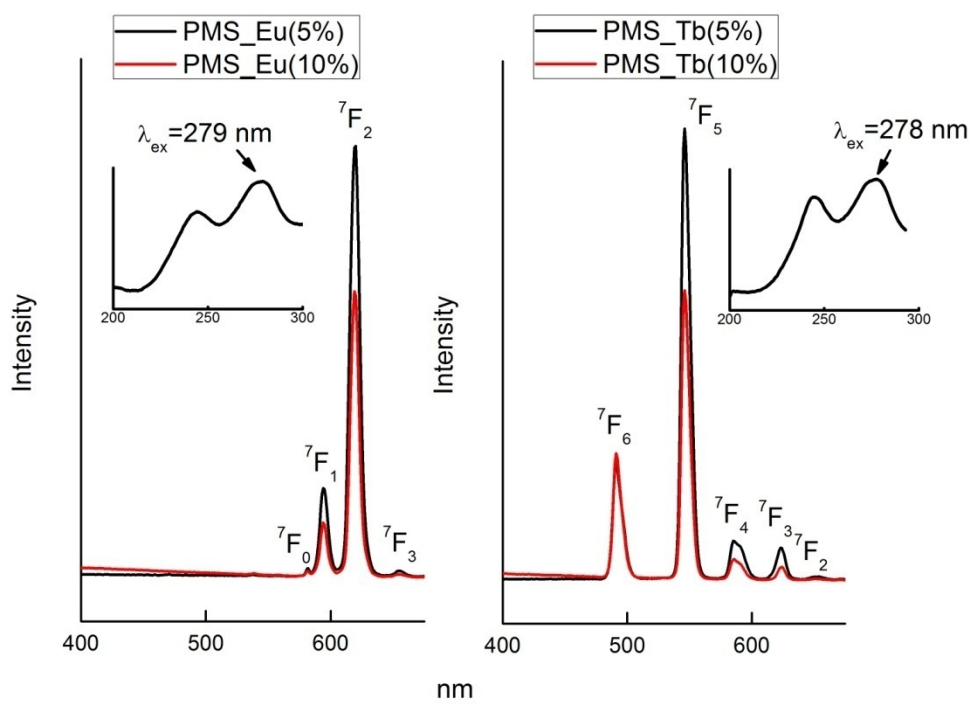

**Figure S15.** Emission spectra of PMS\_Ln (Eu<sup>3+</sup> and Tb<sup>3+</sup>) in solid state.
